# Supplementary material
Source: HighWire-hosted journal article supplement (https://hw-f5-jim.highwire.org/content/70/7/1481)
Supplement: inline-supplementary-material-1 [file inline-supplementary-material-1.pdf]

Table-S1: Comparison of clinical outcomes between new-onset DM and pre-existing DM group.

| <b>Clinical outcomes, n(%)</b> | <b>New-Onset DM<br/>n=60</b> | <b>Pre-existing DM<br/>n=80</b> | <b>p value</b> |
|--------------------------------|------------------------------|---------------------------------|----------------|
| Intubation                     | 13(21.6)                     | 4(5.4)                          | 0.007          |
| Mortality                      | 12(20.0)                     | 4(5.4)                          | 0.016          |
| ICU admittance                 | 12(20.0)                     | 6(7.5)                          | 0.060          |

Statistical significance at  $p < 0.05$ . Abbreviations: DM: diabetes mellitus, ICU: intensive care unit
